# Supplementary material for: Cohort profile: the multigeneration Respiratory Health in Northern Europe, Spain and Australia (RHINESSA) cohort
Source: PubMed Central journal article supplement (PMC9163543; doi:10.1136/bmjopen-2021-059434), 2022-06-02

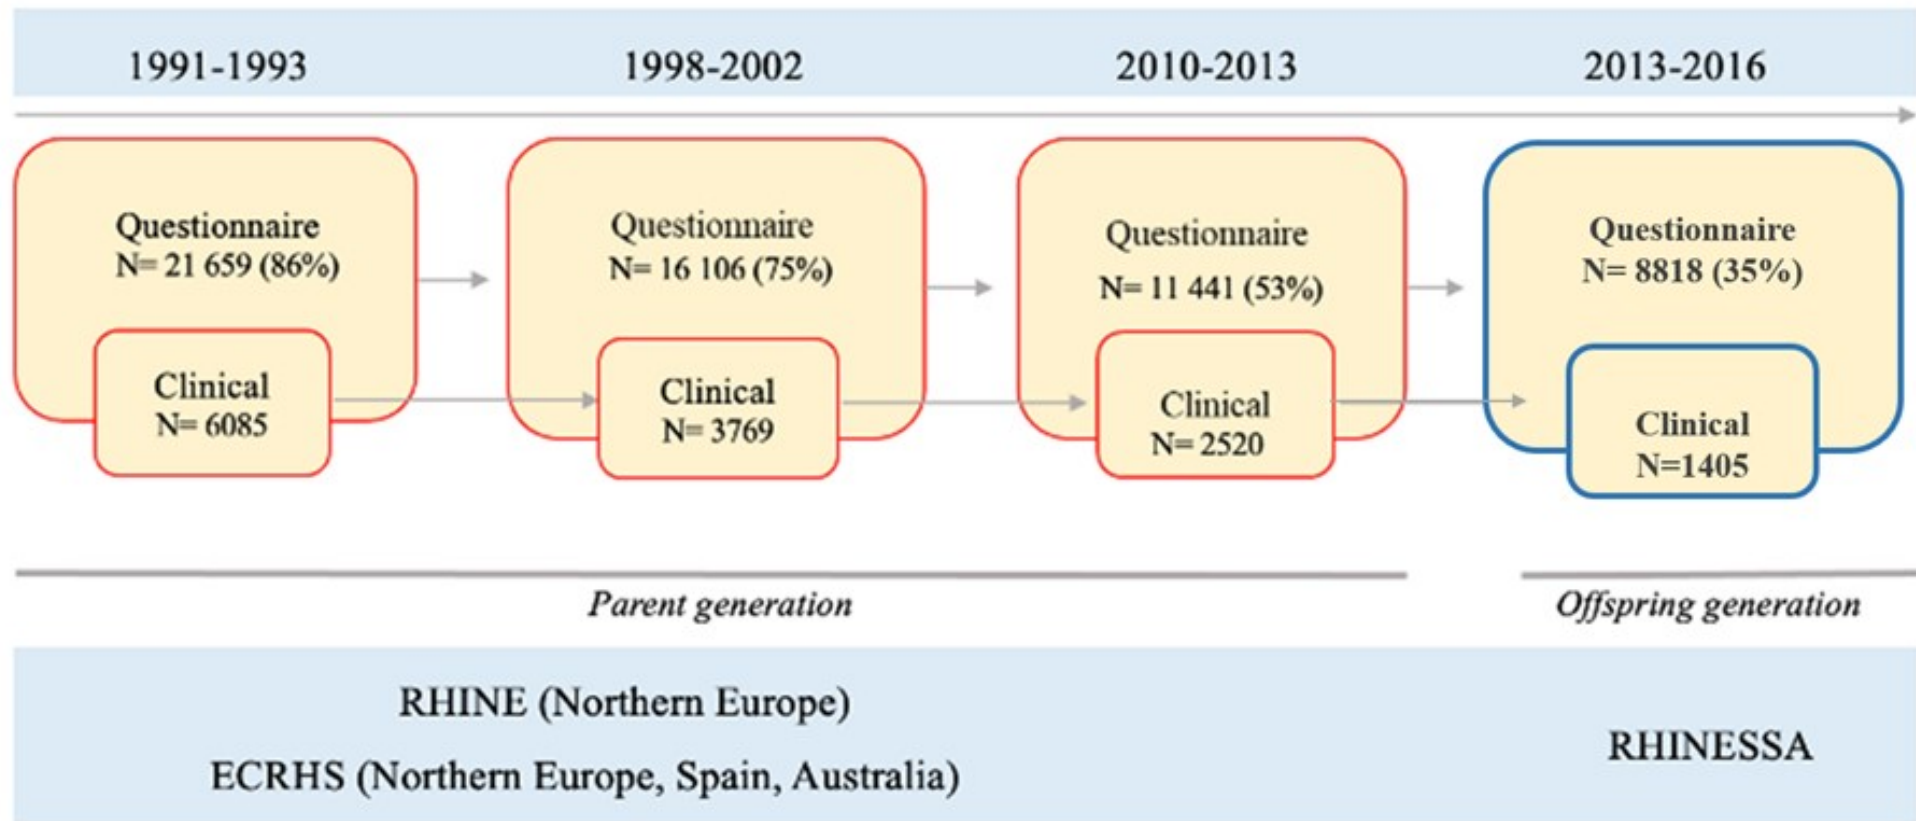

Supplement: bmjopen-2021-059434supp002.pdf [file bmjopen-2021-059434supp002.pdf]
